# Supplementary material for: Inhibition potential of margolonone and isomargolonone against the dengue virus protease using molecular modeling approaches
Source: Front Bioinform. 2025 Mar 26;5:1517115. doi: 10.3389/fbinf.2025.1517115 (PMC11979248; doi:10.3389/fbinf.2025.1517115)
Supplement: Supplementary file 2 [file Table1.xlsx]

## Sheet: Sheet1
Supplementary Table 1. Physiochemical parameters bioactive compounds used in studies
Properties	Margolonone	Isomargolonone
Molecular Weight (g/mol)	314.38	314.38
Consensus Log Po/w	3.06	3.06
Number of H-bond acceptors	4	4
Number of H-bond donors	1	1
Num of rotatable bonds	1	1
Lipinski	0	0
Bioavailability score	0.85	0.85
Synthetic accessibility (SA)	3.44	3.31
TPSA (Å²)	71.44	71.44
Solubility class	Moderate	Moderate
